# Supplementary material for: Genetic algorithm optimization of tree-based models to predict cargo- and carrier-related factors affecting drug release from liposomes
Source: Royal Society of Chemistry journal article supplement (doi:10.1039/d5nr00016e), 2025-01-01
Supplement: d5nr00016e1.xlsx [file d5nr00016e1.xlsx]

## Sheet: Sheet1
		Cargo-related factors				release(%)																																						Liposome-related factors
Reference	DOI	Cargo	Water solubility (mg/ml)	Log p	Molecular weight (g/mol)	1h		4h		8h		24h		48h		72h		T20%(min)	T50%(min)	release medium composition(v/v%)				pH of release medium	surfactant	surfactant% (w/v)	temperature (°C)	stirring (rpm)	volume of medium (ml)	EE%	amount of drug (mg)	volume in the bag (ml)	concentration of drug in the dialysis bag (mg/ml)	details of method	size measurment after dialysis process									Size (nm)			Drug:lipid molar ratio	Phsopholipid (mol%)	Cholesterol (mol%)
						mean	sd	mean	sd	mean	sd	mean	sd	mean	sd	mean	sd	time required for releasing 20% of formulation	time required for releasing 50% of formulation	component1	v/v%	component2	v/v%												size (nm)	time (min)	size (nm)	time (min)	size (nm)	time (min)	size (nm)	time (min)	pH	Mean	SD	SEM
Xie, 2023	https://doi.org/10.1016/j.biopha.2023.114304	Oxaliplatin	6	-0.47	397.294	32		60		72		88		94				25	168	dextrose 5%	100			7.4	tween 80	0.106	37	100	100	44.23	0.8846	2	0.44		NA	NA	NA	NA	NA	NA	NA	NA	NA	150.2	1.57	NA	0.0388	76.08	23.92
Xie, 2023	https://doi.org/10.1016/j.biopha.2023.114304	Oxaliplatin	6	-0.47	397.294	28		55		68		85		90				30	192	dextrose 5%	100			7.4	tween 80	0.106	37	100	100	45.34	0.9068	2	0.45		NA	NA	NA	NA	NA	NA	NA	NA	NA	160.33	1.2	NA	0.0388	76.08	23.92
Xie, 2023	https://doi.org/10.1016/j.biopha.2023.114304	Oxaliplatin	6	-0.47	397.294	22		46		55		78		80				54	348	dextrose 5%	100			7.4	tween 80	0.106	37	100	100	44.27	0.8854	2	0.44		NA	NA	NA	NA	NA	NA	NA	NA	NA	171.15	0.92	NA	0.0374	76.91	23.09
Xie, 2023	https://doi.org/10.1016/j.biopha.2023.114304	Oxaliplatin	6	-0.47	397.294	20		41		50		71		81				60	456	dextrose 5%	100			7.4	tween 80	0.106	37	100	100	44.1	0.882	2	0.44		NA	NA	NA	NA	NA	NA	NA	NA	NA	168.46	2.03	NA	0.0373	77	23
Xie, 2023	https://doi.org/10.1016/j.biopha.2023.114304	Paclitaxel	0.00556	3	853.91	28		44		52		82		82				36	408	dextrose 5%	100			7.4	tween 80	0.106	37	100	100	69.88	2.7952	2	1.4		NA	NA	NA	NA	NA	NA	NA	NA	NA	150.2	1.57	NA	0.0361	76.075	23.925
Xie, 2023	https://doi.org/10.1016/j.biopha.2023.114304	Paclitaxel	0.00556	3	853.91	24		39		50		76		87				42	480	dextrose 5%	100			7.4	tween 80	0.106	37	100	100	67.02	2.6808	2	1.34		NA	NA	NA	NA	NA	NA	NA	NA	NA	160.33	1.2	NA	0.0361	76.075	23.925
Xie, 2023	https://doi.org/10.1016/j.biopha.2023.114304	Paclitaxel	0.00556	3	853.91	9		20		44		68		70				240	600	dextrose 5%	100			7.4	tween 80	0.106	37	100	100	65.45	2.618	2	1.31		NA	NA	NA	NA	NA	NA	NA	NA	NA	171.15	0.92	NA	0.0348	76.91	23.09
Xie, 2023	https://doi.org/10.1016/j.biopha.2023.114304	Paclitaxel	0.00556	3	853.91	12		35		46		67		69				120	546	dextrose 5%	100			7.4	tween 80	0.106	37	100	100	65.85	2.634	2	1.32		NA	NA	NA	NA	NA	NA	NA	NA	NA	168.46	2.03	NA	0.0347	77	23
sessevmez, 2023	https://doi.org/10.1080/00914037.2023.2225117	nebivolol hcl	0.0403	2.44	441.9	10		21		26		31.96						210		PBS	100			6.8		0	37	NA	15	NA	NA	NA	NA		NA	NA	NA	NA	NA	NA	NA	NA	NA	154.1	3.4	NA	NA	75	25
sessevmez, 2023	https://doi.org/10.1080/00914037.2023.2225117	nebivolol hcl	0.0403	2.44	441.9	12		28		38.5		78						159	813	PBS	100			6.8		0	37	NA	15	NA	NA	NA	NA		NA	NA	NA	NA	NA	NA	NA	NA	NA	196.9	0.7	NA	NA	75	25
sessevmez, 2023	https://doi.org/10.1080/00914037.2023.2225117	nebivolol hcl	0.0403	2.44	441.9	32.6		71		73		73							150	PBS	100			6.8		0	37	NA	15	NA	NA	NA	NA		NA	NA	NA	NA	NA	NA	NA	NA	NA	253.1	5.6	NA	NA	75	25
Shah, 2023	https://doi.org/10.1016/j.jddst.2023.104509	Cisplatin	2.53	-2.19	300.05	14		37										75		PBS	100			7.4		0	37	NA	200	NA	NA	NA	NA		NA	NA	NA	NA	NA	NA	NA	NA	NA	121.2	2.19	NA	NA	100	0
Shah, 2023	https://doi.org/10.1016/j.jddst.2023.104509	Cisplatin	2.53	-2.19	300.05	17		33.8										72		PBS	100			7.4		0	37	NA	200	NA	NA	NA	NA		NA	NA	NA	NA	NA	NA	NA	NA	NA	136.1	1.16	NA	NA	100	0
Shah, 2023	https://doi.org/10.1016/j.jddst.2023.104509	Cisplatin	2.53	-2.19	300.05	16		34.5										84		PBS	100			7.4		0	37	NA	200	NA	NA	NA	NA		NA	NA	NA	NA	NA	NA	NA	NA	NA	160.6	1.83	NA	NA	100	0
Shah, 2023	https://doi.org/10.1016/j.jddst.2023.104509	Cisplatin	2.53	-2.19	300.05	14.5		31										81		PBS	100			7.4		0	37	NA	200	NA	NA	NA	NA		NA	NA	NA	NA	NA	NA	NA	NA	NA	184.5	2.11	NA	NA	100	0
Shah, 2023	https://doi.org/10.1016/j.jddst.2023.104509	Cisplatin	2.53	-2.19	300.05	6		15.5												PBS	100			7.4		0	37	NA	200	NA	NA	NA	NA		NA	NA	NA	NA	NA	NA	NA	NA	NA	201.8	3.31	NA	NA	100	0
karimi, 2023	https://doi.org/10.1080/02652048.2023.2194415	piperine	0.149	3.38	285.34					20		36		50		64		562	3000	PBS	100			7.4		0	37	50	30		0.7	NA	NA		NA	NA	NA	NA	NA	NA	NA	NA	NA	513	8	NA	0.033	90	10
meng, 2023	https://doi.org/10.3389/fbioe.2022.1097178	naringin	4.06	-0.24	580.54	22.3		36.2		48		74.4		84.5		90.2		48	528	PBS	100			7.4	Tween 80	2.12	37	NA	50	76.3	0.3	1	0.3		NA	NA	NA	NA	NA	NA	NA	NA	NA	136.9	16.4	NA	0.05	70	30
pandey, 2023	https://doi.org/10.1007/s00210-023-02441-5	resveratrol	0.0688	2.57	228.24	15.5		33.5		55.5		77.75						118	437	PBS	70	ethanol	30	7.4		1.06	37	100	30		NA	NA	NA		NA	NA	NA	NA	NA	NA	NA	NA	NA	134.34	9	NA	NA	90.46	9.54
zhao, 2023	https://doi.org/10.3390/biomedicines11102869	triptolide	0.886	1.22	360.41	65		72.5		74								0	30	PBS	100			7.4	Tween 80	1.06	37	100	200		NA	NA	NA		NA	NA	NA	NA	NA	NA	NA	NA	NA	121.1	3.4	NA	0.2895	81.58	18.42
zhao, 2023	https://doi.org/10.3390/biomedicines11102869	triptolide	0.886	1.22	360.41	63		71		72								0	30	PBS	100			7.4	Tween 80	0	37	100	200		NA	NA	NA		NA	NA	NA	NA	NA	NA	NA	NA	NA	130.33	1.89	NA	0.2895	81.58	18.42
moiseev, 2022	https://doi.org/10.1021/acs.langmuir.2c02086	ciprofloxacin HCl	1.35	-0.57	385.82	37.3		67.6		85.8		101.4						30	101	NaCl 0/9%	100			7.4		0	37	NA	30	27	0.54	2	0.27		NA	NA	NA	NA	NA	NA	NA	NA	NA	101	1	NA	NA	83.36	16.64
moiseev, 2022	https://doi.org/10.1021/acs.langmuir.2c02086	ciprofloxacin HCl	1.35	-0.57	385.82	33.4		70.8		85.4		103						30	120	NaCl 0/9%	100			7.4		0	37	NA	30	28	0.56	2	0.28		NA	NA	NA	NA	NA	NA	NA	NA	NA	94	1	NA	NA	83.72	16.28
moiseev, 2022	https://doi.org/10.1021/acs.langmuir.2c02086	ciprofloxacin HCl	1.35	-0.57	385.82	39.2		78.3		91.7		104.3						30	90	NaCl 0/9%	100			7.4		0	37	NA	30	27	0.54	2	0.27		NA	NA	NA	NA	NA	NA	NA	NA	NA	97	1	NA	NA	83.7	16.3
charbe, 2022	https://doi.org/10.1016/j.biopha.2022.113428	Paclitaxel	0.00556	3	853.91	28		63.8		73								35	168	PBS	100			7.4		0	37	NA	10		NA	NA	0.1		NA	NA	NA	NA	NA	NA	NA	NA	NA	90	4.9	NA	0.01	85	15
Shah, 2022	https://doi.org/10.3390/pharmaceutics14010129	Cisplatin	2.53	-2.19	300.05	13		17.5		21		31						330		PBS	100			7.4		0	37	70	NA		5	NA	NA		NA	NA	NA	NA	NA	NA	NA	NA	NA	206.4	2.26	NA	0.1666	50.03	49.97
Shah, 2022	https://doi.org/10.3390/pharmaceutics14010129	Cisplatin	2.53	-2.19	300.05	15.1		20.5		24		35						210		PBS	100			7.4		0	37	70	NA		5	NA	NA		NA	NA	NA	NA	NA	NA	NA	NA	NA	194.3	2.21	NA	0.1666	55.03	44.97
Shah, 2022	https://doi.org/10.3390/pharmaceutics14010129	Cisplatin	2.53	-2.19	300.05	16		21		25		36.5						192		PBS	100			7.4		0	37	70	NA		5	NA	NA		NA	NA	NA	NA	NA	NA	NA	NA	NA	191.2	1.67	NA	0.1666	60.03	39.97
Shah, 2022	https://doi.org/10.3390/pharmaceutics14010129	Cisplatin	2.53	-2.19	300.05	14.8		19.8		23.5		34						240		PBS	100			7.4		0	37	70	NA		5	NA	NA		NA	NA	NA	NA	NA	NA	NA	NA	NA	171.9	2.26	NA	0.1666	65.03	34.97
Shah, 2022	https://doi.org/10.3390/pharmaceutics14010129	Cisplatin	2.53	-2.19	300.05	13		18		21.5		32						300		PBS	100			7.4		0	37	70	NA		5	NA	NA		NA	NA	NA	NA	NA	NA	NA	NA	NA	153.2	3.08	NA	0.1665	70.02	29.98
Ding, 2022	10.3389/fbioe.2022.860515	Taxifolin	1.16	0.95	304.252	30.5		43		57.5		68.2						30	348	SIF	100			6.8		0	37	100	200	91.3	1.8	2	0.9		NA	NA	NA	NA	NA	NA	NA	NA	NA	96.18	0.66	NA	0.32	74.96	25.04
Ding, 2022	10.3389/fbioe.2022.860515	Taxifolin	1.16	0.95	304.252	19		32		43		55.66						66	716	SIF	100			6.8		0	37	100	200	84.7	1.6	2	0.8		NA	NA	NA	NA	NA	NA	NA	NA	NA	109.27	0.5	NA	0.32	74.96	25.04
Tavakoli, 2022	https://doi.org/10.1016/j.ijpharm.2022.121725	Sunitinib	0.0308	5.2	398.474	6		25		42.9		85		95.5		97		180	576	DPBS	100	HP β-CD	15mM	7.4		0	37	300	14		NA	NA	NA		NA	NA	NA	NA	NA	NA	NA	NA	NA	104	28	NA	NA	100	0
Kutbi, 2021	https://doi.org/10.3390/ma14195759	Berberine	0.000354	-0.18	336.361	21		25.9		30		45						24		PBS	100			6.8		0	37	100	900		NA	NA	NA		NA	NA	NA	NA	NA	NA	NA	NA	NA	520.7	19.9	NA	0.0885	53.79	46.21
Elsayad, 2021	https://doi.org/10.1080/10837450.2020.1870237	Rivaroxaban	0.01	1.74	435.881	23.7		26.6		44		44.3						33		PBS	100			7.4	DMSO	0	37	100	100		NA	NA	NA		NA	NA	NA	NA	NA	NA	NA	NA	NA	118.5	2.26	NA	0.13	42.8	57.2
Elsayad, 2021	https://doi.org/10.1080/10837450.2020.1870237	Rivaroxaban	0.01	1.74	435.881	18		24.9		37		43.06						144		PBS	100			7.4	DMSO	0	37	100	100		NA	NA	NA		NA	NA	NA	NA	NA	NA	NA	NA	NA	92.1	5.92	NA	0.13	42.8	57.2
Kesharwani, 2021	https://doi.org/10.3390/polym13020250	Azacitidine	89	-3.5	244.205	35		53		61		78.1						25	150	PBS	100			7.4		0	37	100	100		5	1	5		NA	NA	NA	NA	NA	NA	NA	NA	NA	107	1.17	NA	NA	53.7903	46.2097
ezkiel, 2021	https://doi.org/10.3390/pharmaceutics13060821	5 flourouracil	11.1	-0.89	130.08	37		55		68								22.5	120	PBS	100			7.4		0	37	100	20		NA	NA	NA		NA	NA	NA	NA	NA	NA	NA	NA	NA	NA	NA	NA	2.38	59.95	40.05
vakili, 2020	https://doi.org/10.1038/s41598-020-62501-1	docetaxel	0.0127	2.4	807.88	0		13		17		19		40		58		1582	3754	fresh human plasma	50	dextrose 5%	50	7.4		0	37	NA	NA		NA	NA	0.64	incubation in 37°	NA	NA	NA	NA	NA	NA	NA	NA	NA	125	NA	NA	NA	90	10
vakili, 2020	https://doi.org/10.1038/s41598-020-62501-1	docetaxel	0.0127	2.4	807.88	12		27		30		32		40		58		120	3754	fresh human plasma	50	dextrose 5%	50	7.4		0	37	NA	NA		NA	NA	0.57	incubation in 37°	NA	NA	NA	NA	NA	NA	NA	NA	NA	139	NA	NA	NA	90.48	9.52
vakili, 2020	https://doi.org/10.1038/s41598-020-62501-1	docetaxel	0.0127	2.4	807.88	5		13		18		19		23		70		1830	3754	fresh human plasma	50	dextrose 5%	50	7.4		0	37	NA	NA		NA	NA	0.83	incubation in 37°	NA	NA	NA	NA	NA	NA	NA	NA	NA	108.4	NA	NA	NA	90.48	9.52
Jagwani, 2020	10.1021/ acsbiomaterials.0c00429	Resveratrol	0.0688	2.57	228.243	18		37		49		75.9		100				72	492	PBS	100			7.4	PEG-400	0	37	100	100		4	5	0.8		NA	NA	NA	NA	NA	NA	NA	NA	NA	145.78	9.9	NA	0.0075	75.33	21.57
Okafor, 2020	https://doi.org/10.1007/s40005-019-00458-8	Efavirenz	0.00855	4.6	315.675	30		36.9		47.5		59.5		68.8		77.1		24	564	PBS	100			7.4		0	37	100	150		6	3	2		NA	NA	NA	NA	NA	NA	NA	NA	NA	411.1	7.4	NA	NA	33.28	66.72
Ghafari, 2020	10.1002/jcb.29651	Cisplatin	2.53	-2.19	300.05	3.9		5.9		8.3		13.5		13.9						PBS	100			NA		0	37		10		NA	NA	NA		NA	NA	NA	NA	NA	NA	NA	NA	NA	119.7	2.1	NA	NA	90.5	9.5
Ghodake, 2020	https://doi.org/10.1016/j.ijpharm.2020.119696	Cefoperazone sodium	0.376	0.97	667.65	18.5		40		46		58.8						66	570	simulated lumg fluid	100			7.4		0.106	37	200	NA		10	NA	NA		NA	NA	NA	NA	NA	NA	NA	NA	NA	410.85	26	NA	17.5	70	30
darwitan, 2020	https://doi.org/10.1002/adhm.202000465	fluocinolone acetonide	0.0547	2.48	452.49					9		38		60		75		720	2400	PBS	100			7.4		0.106	37	50	40		0.98	1	0.98		NA	NA	NA	NA	NA	NA	NA	NA	NA	90.6	0.2	NA	0.15	100	0
darwitan, 2020	https://doi.org/10.1002/adhm.202000465	fluocinolone acetonide	0.0547	2.48	452.49					7		29		48		62		1080	3330	PBS	100			7.4		0.106	37	50	40		0.86	1	0.86		NA	NA	NA	NA	NA	NA	NA	NA	NA	94.4	1.8	NA	0.15	100	0
darwitan, 2020	https://doi.org/10.1002/adhm.202000465	fluocinolone acetonide	0.0547	2.48	452.49							21		32		37		1800	7200	PBS	100			7.4		0.106	37	50	40		0.94	1	0.94		NA	NA	NA	NA	NA	NA	NA	NA	NA	89.5	0.7	NA	0.15	100	0
darwitan, 2020	https://doi.org/10.1002/adhm.202000465	fluocinolone acetonide	0.0547	2.48	452.49					16		46		72		84		600	1872	PBS	100			7.4		0.106	37	50	40		0.66	1	0.66		NA	NA	NA	NA	NA	NA	NA	NA	NA	101.3	2	NA	0.15	100	0
yang, 2020	https://doi.org/10.1016/j.chemphyslip.2020.104882	paclitaxel	0.0056	3	853.91			37		45		57		58					690	PBS	100			7.4	Tween 80	0	37	NA	40		NA	0.4	NA		NA	NA	NA	NA	NA	NA	NA	NA	NA	103.5	4.2	NA	NA	65.26	34.74
yang, 2020	https://doi.org/10.1016/j.chemphyslip.2020.104882	paclitaxel	0.0056	3	853.91			36		47		56		63					640	PBS	100			7.4	Tween 80	0	37	NA	40		NA	0.4	NA		NA	NA	NA	NA	NA	NA	NA	NA	NA	105.6	1.9	NA	NA	63.27	36.73
yang, 2020	https://doi.org/10.1016/j.chemphyslip.2020.104882	paclitaxel	0.0056	3	853.91			38		46		60		67					618	PBS	100			7.4	Tween 80	0	37	NA	40		NA	0.4	NA		NA	NA	NA	NA	NA	NA	NA	NA	NA	119.3	3.9	NA	NA	63.27	36.73
yang, 2020	https://doi.org/10.1016/j.chemphyslip.2020.104882	paclitaxel	0.0056	3	853.91					47		57		63.5					660	PBS	100			7.4	Tween 80	0	37	NA	40		NA	0.4	NA		NA	NA	NA	NA	NA	NA	NA	NA	NA	117.4	4.1	NA	NA	61.39	38.61
yang, 2020	https://doi.org/10.1016/j.chemphyslip.2020.104882	paclitaxel	0.0056	3	853.91			35		46		59		62					610	PBS	100			7.4	Tween 80	0	37	NA	40		NA	0.4	NA		NA	NA	NA	NA	NA	NA	NA	NA	NA	114.2	2.9	NA	NA	63.27	36.73
wang, 2020	https://doi.org/10.1039/C9TB02538C	dexamethasone	0.089	1.83	392.46	27		73		78		78		78.8				16	64	PBS	100			7.4		0.1	37	70	50	16.7	0.0835	0.5	0.167		NA	NA	NA	NA	NA	NA	NA	NA	NA	134.7	6.5	NA	NA	100	0
Alomrani, 2019	https://doi.org/10.1016/j.jsps.2019.02.008	5-Fluorouracil	11.1	-0.89	130.077	30.2		43.5		57		67						28	330	PBS	100			7.4		0.1	37	100	50		5	NA	NA		NA	NA	NA	NA	NA	NA	NA	NA	NA	234	9	NA	NA	76.92	23.08
Alomrani, 2019	https://doi.org/10.1016/j.jsps.2019.02.008	5-Fluorouracil	11.1	-0.89	130.077	23		37		46.5		60						46	570	PBS	100			7.4		0	37	100	50		5	NA	NA		NA	NA	NA	NA	NA	NA	NA	NA	NA	212	21	NA	NA	76.92	23.08
Ji, 2019	10.1039/x0xx00000x	D-glucosamine sulphate	195	-2.6	456.42	19.8		20.1		22.6		32.4		39		44.9		120	5472	H2O	100			NA		2.02	37	15	40		NA	1	NA		NA	NA	NA	NA	NA	NA	NA	NA	NA	120	NA	NA	2.65	66.2	33.8
Ji, 2019	10.1039/x0xx00000x	D-glucosamine sulphate	195	-2.6	456.42	12		13		14.8		24.5		29.6		33.5		900	6912	PBS	100			NA		0.1	37	15	40		NA	1	NA		NA	NA	NA	NA	NA	NA	NA	NA	NA	109	NA	NA	2.65	66.2	33.8
Zhang, 2019	https://doi.org/10.1080/03639045.2019.1569038	Lupeol	0.000195	5.97	426.729	7		19.9		32		46.5						240		PBS	100			7.4	Tween80	0.1	37	100	NA		NA	NA	3		NA	NA	NA	NA	NA	NA	NA	NA	NA	97.23	0.63	NA	0.0474	77.49	22.51
Zhang, 2019	https://doi.org/10.1080/03639045.2019.1569038	Lupeol	0.000195	5.97	426.729	4		11.5		23		35.8						420		PBS	100			7.4	Tween80	0.53	37	100	NA		NA	NA	3		NA	NA	NA	NA	NA	NA	NA	NA	NA	126.9	1.212	NA	0.0464	77.97	22.0339
Wang, 2019	http://doi.org/10.2147/DDDT.S205787	Curcumin	0.00575	3.62	368.38	23		34		58		79						48	393	PBS	80	ethanol	20	7.4		0.53	37	75	200		5	1	5		NA	NA	NA	NA	NA	NA	NA	NA	NA	106.8	7.2	NA	0.175129	49.9438	50.0562
Wang, 2019	http://doi.org/10.2147/DDDT.S205787	Curcumin	0.00575	3.62	368.38	21		31		55		76						54	432	PBS	80	ethanol	20	7.4		1	37	75	200		5	1	5		NA	NA	NA	NA	NA	NA	NA	NA	NA	109.4	5.1	NA	0.171171	51.08	48.9248
Wang, 2019	http://doi.org/10.2147/DDDT.S205787	Curcumin	0.00575	3.62	368.38	25		37		52		74						42	450	PBS	80	ethanol	20	7.4		1	37	75	200		5	1	5		NA	NA	NA	NA	NA	NA	NA	NA	NA	112.3	4.6	NA	0.17	50.92	49.0763
Dhoble, 2019	https://doi.org/10.1007/s13346-019-00641-2	Erlotinib HCl	0.00891	3.13	429.9	19		46.5		60		66						63	324	SLF	100			7.4		0	NA	400	50		0.1	NA	NA		NA	NA	NA	NA	NA	NA	NA	NA	NA	479.3	NA	NA	6.5	70	30
abud, 2019	https://doi.org/10.1186/s40942-019-0186-7	sirolimus	0.00173	4.63	914.19					3		10		38		43		1920	5520	TES bufer	100			7.4	de sodium lauryl sulfate	0	37	NA	100	95.41	4.7705	1	4.7705		NA	NA	NA	NA	NA	NA	NA	NA	NA	99.37	11.9	NA	0.1413	100	0
ghassemi, 2018	10.1208/s12249-018-1118-9	carvedilol	88	3.8	406.47	12		28		48								150	495	SIF	100	NaTC	10mM	6.8	tween 80	0	37	100	NA		NA	NA	NA		174.8	480	NA	NA	NA	NA	NA	NA	6.8	104.3	3.9	NA	NA	85	15
ghassemi, 2018	10.1208/s12249-018-1118-9	carvedilol	88	3.8	406.47	9.5		30		46.5								153	530	SIF	100	NaTC	10mM	6.8	tween 80	0	37	100	NA		NA	NA	NA		151.5	480	NA	NA	NA	NA	NA	NA	6.8	76.2	4.8	NA	NA	65	15
ghassemi, 2018	10.1208/s12249-018-1118-9	carvedilol	88	3.8	406.47	21		57		94								57	201	SIF	100			6.8	tween 80	0	37	100	NA		NA	NA	NA		110.7	480	NA	NA	NA	NA	NA	NA	6.8	104.3	3.9	NA	NA	85	15
ghassemi, 2018	10.1208/s12249-018-1118-9	carvedilol	88	3.8	406.47	20		49		77								60	245	SIF	100			6.8	tween 80	0	37	100	NA		NA	NA	NA		71.8	480	NA	NA	NA	NA	NA	NA	6.8	76.2	4.8	NA	NA	65	15
Tian, 2018	https://doi.org/10.1080/03639045.2018.1512613	Paclitaxel	0.00556	3	853.91	14.9		36.9		58.5		86		94				108	360	PBS	100			7.4	Tween80	0	37	80	20		NA	2	NA		NA	NA	NA	NA	NA	NA	NA	NA	NA	101.5	0.68	NA	0.05	91.31	8.69
Tian, 2018	https://doi.org/10.1080/03639045.2018.1512613	Paclitaxel	0.00556	3	853.91	6.7		30		47		69		73.5				120	528	PBS	100			7.4	Tween80	0	37	80	20		NA	2	NA		NA	NA	NA	NA	NA	NA	NA	NA	NA	139.4	2.26	NA	0.05	91.31	8.69
Chennakesavulu, 2018	https://doi.org/10.1016/j.ajps.2017.08.005	Colchicine	10	1.07	399.443	16		35.5		52		90.5						87	445	PBS	100			7.4	SLS	0	NA	50	13		NA	2	NA		NA	NA	NA	NA	NA	NA	NA	NA	NA	134.7	2.8	NA	0.06	90	10
Chennakesavulu, 2018	https://doi.org/10.1016/j.ajps.2017.08.005	Budesonide	0.0457	1.914	430.534	17		30		43		89.5						105	576	PBS	100			7.4	SLS	0	NA	50	13		NA	2	NA		NA	NA	NA	NA	NA	NA	NA	NA	NA	134.4	4.1	NA	0.0571429	90	10
Jin, 2018	https://doi.org/10.1016/j.ijpharm.2018.10.033	Brinzolamide	0.713	-0.65	383.507	29		82.5		85		87.5						44	86	STF	100			NA		0.212	37	NA	40		NA	NA	NA		NA	NA	NA	NA	NA	NA	NA	NA	NA	96.87	4.43	NA	0.1	50	50
Zhou, 2018	http://dx.doi.org/10.2147/OTT.S169555	Quercetin	0.06	1.81	302.236	20.1		36.1		42		53.5		58				60	705	PBS	90	alcohol	10	7.4		0	37	75	18		NA	NA	NA		NA	NA	NA	NA	NA	NA	NA	NA	NA	93.4	7.2	NA	0.0204	61.22	38.7755
Shrivastava, 2018	https://doi.org/10.1016/j.bbrc.2018.06.060	Lapatinib	0.0223	5.4	581.06	19		38.3		55.5		75.8		78				70	315	PBS	100			7.4		0	37	100	20		1	1	1		NA	NA	NA	NA	NA	NA	NA	NA	NA	106.3	NA	0.4	NA	83.33	16.67
Shrivastava, 2018	https://doi.org/10.1016/j.bbrc.2018.06.060	Lapatinib	0.0223	5.4	581.06	12		29.8		46		67		69				170	620	PBS	100			7.4		0	37	100	20		1	1	1		NA	NA	NA	NA	NA	NA	NA	NA	NA	108	NA	0.8	NA	84.62	15.38
jin, 2018	0.3892/ol.2017.7613	methotrexate	0.0819	-1.85	454.44	45		82										18	78	simulated saliva	100			6.75		0	37	250	20		NA	2	NA		NA	NA	NA	NA	NA	NA	NA	NA	NA	137.4	2.6	NA	NA	65	35
zhou, 2018	https://doi.org/10.2147/DDDT.S146925	erlotinib	0.00891	2.7	393.44	22.5		45		65								48	282	PBS	100			7.4		0	37	600	17		10	NA	NA		NA	NA	NA	NA	NA	NA	NA	NA	NA	100.1	2.6	NA	0.098934	71.43	28.57
zhou, 2018	https://doi.org/10.2147/DDDT.S146925	erlotinib	0.00891	2.7	393.44	21		42.5		62								54	312	PBS	100			7.4		0	37	600	17		10	NA	NA		NA	NA	NA	NA	NA	NA	NA	NA	NA	102.4	3.1	NA	0.125105	71.43	28.57
godbole, 2018	https://doi.org/10.22270/jddt.v8i5-s.1935	lamivudine	70	-1.4	229.26	25		62		96.85								48	197.4	PBS	100			7.4		0	37	300	200		2	NA	NA		NA	NA	NA	NA	NA	NA	NA	NA	NA	273	2.04	NA	NA	33.33	66.67
godbole, 2018	https://doi.org/10.22270/jddt.v8i5-s.1935	lamivudine	70	-1.4	229.26	24		65		96								48	187.5	PBS	100			7.4		0	37	300	200		2	NA	NA		NA	NA	NA	NA	NA	NA	NA	NA	NA	241.5	2.12	NA	NA	33.33	66.67
godbole, 2018	https://doi.org/10.22270/jddt.v8i5-s.1935	lamivudine	70	-1.4	229.26	25.9		67		95								39	178.5	PBS	100			7.4		0	37	300	200		2	NA	NA		NA	NA	NA	NA	NA	NA	NA	NA	NA	286.2	3.28	NA	NA	25	75
godbole, 2018	https://doi.org/10.22270/jddt.v8i5-s.1935	lamivudine	70	-1.4	229.26	27.5		67		96								33	165	PBS	100			7.4		0	37	300	200		2	NA	NA		NA	NA	NA	NA	NA	NA	NA	NA	NA	261.2	2.82	NA	NA	33.33	66.67
jia, 2018	https://doi.org/10.1016/j.ijpharm.2018.02.001	dexamethasone	0.089	1.83	392.46	24		51		59		61						52.1	247.1	PBS	100			7.4	Tween80	0	37	100	45		1	1	1		NA	NA	NA	NA	NA	NA	NA	NA	NA	58.07	1.02	NA	0.0385	100	0
benerjee, 2017	https://doi.org/10.1016/j.jcis.2016.12.025	apigenin	0.118	3.07	270.24	2		8		16.1		43.2		62.7		72.1		588	1896	HBS	90	ethanol	10	7.4		0	37	100	50		0.5	1	0.5		NA	NA	NA	NA	NA	NA	NA	NA	NA	103.2	2.1	NA	0.375	100	0
li, 2017	https://doi.org/10.1016/j.msec.2017.05.136	curcumin	0.00575	3.62	368.38	7		36.5		55		81		81.5				120	415	PBS	70	ethanol	30	7.4		1.06	37	100	50		NA	NA	NA		NA	NA	NA	NA	NA	NA	NA	NA	NA	276	3.8	NA	0.1502	71.38	28.62
li, 2017	https://doi.org/10.1016/j.msec.2017.05.136	curcumin	0.00575	3.62	368.38	6		16.8		24.5		39		44.5				336		PBS	70	ethanol	30	7.4		1.06	37	100	50		NA	NA	NA		NA	NA	NA	NA	NA	NA	NA	NA	NA	406	12	NA	0.1502	71.38	28.62
abdelbary, 2017	http://dx.doi.org/10.1080/08982104.2017.1363228	adefovir dipivoxil	0.4	1.91	501.47	18		28.7		43.2								90	606	SPB	100			7.4		0	37	50	500		5	2	2.5		NA	NA	NA	NA	NA	NA	NA	NA	NA	231	42	NA	NA	33.42	66.58
abdelbary, 2017	http://dx.doi.org/10.1080/08982104.2017.1363228	adefovir dipivoxil	0.4	1.91	501.47	30.5		84		92.95									156	SPB	100			7.4		0	37	50	500		5	2	2.5		NA	NA	NA	NA	NA	NA	NA	NA	NA	133.2	17	NA	NA	100	0
abdelbary, 2017	http://dx.doi.org/10.1080/08982104.2017.1363228	adefovir dipivoxil	0.4	1.91	501.47	20.2		31		42.37								60	570	SPB	100			7.4		0	37	50	500		5	2	2.5		NA	NA	NA	NA	NA	NA	NA	NA	NA	869.75	290	NA	NA	33.42	66.58
abdelbary, 2017	http://dx.doi.org/10.1080/08982104.2017.1363228	adefovir dipivoxil	0.4	1.91	501.47	22.5		62		59.52									189	SPB	100			7.4		0	37	50	500		5	2	2.5		NA	NA	NA	NA	NA	NA	NA	NA	NA	1665.2	190	NA	NA	100	0
abdelbary, 2017	http://dx.doi.org/10.1080/08982104.2017.1363228	adefovir dipivoxil	0.4	1.91	501.47	16		43		65.09								68	303	SPB	100			7.4		0	37	50	500		5	2	2.5		NA	NA	NA	NA	NA	NA	NA	NA	NA	175.4	54	NA	NA	33.28	66.72
abdelbary, 2017	http://dx.doi.org/10.1080/08982104.2017.1363228	adefovir dipivoxil	0.4	1.91	501.47	15		41.7		64.85								78	360	SPB	100			7.4		0.106	37	50	500		5	2	2.5		NA	NA	NA	NA	NA	NA	NA	NA	NA	113.71	15	NA	NA	100	0
abdelbary, 2017	http://dx.doi.org/10.1080/08982104.2017.1363228	adefovir dipivoxil	0.4	1.91	501.47	29		49		69.45								30	246	SPB	100			7.4		0	37	50	500		5	2	2.5		NA	NA	NA	NA	NA	NA	NA	NA	NA	164.65	5	NA	NA	33.42	66.58
abdelbary, 2017	http://dx.doi.org/10.1080/08982104.2017.1363228	adefovir dipivoxil	0.4	1.91	501.47	51		72.5		99.8									55	SPB	100			7.4		0	37	50	500		5	2	2.5		NA	NA	NA	NA	NA	NA	NA	NA	NA	669.62	36	NA	NA	100	0
ahammed, 2017	https://doi.org/10.1016/j.lfs.2017.06.022	ritonavir	0.00126	3.9	720.94	80												3.5	9	PBS	100			6.8		0	37	100	900		100	NA	NA		NA	NA	NA	NA	NA	NA	NA	NA	NA	126.6	6.2	NA	0.1791	66.67	33.33
ahammed, 2017	https://doi.org/10.1016/j.lfs.2017.06.022	ritonavir	0.00126	3.9	720.94	93.5												2.8	7	PBS	100			6.8		1.01	37	100	900		100	NA	NA		NA	NA	NA	NA	NA	NA	NA	NA	NA	149.8	6.8	NA	0.1791	66.67	33.33
song, 2017	https://doi.org/10.1016/j.ejps.2016.09.024	tetrandrine	0.00296	6.48	622.76	6		10				17.5		25.74						PBS	90	fetal bovine serum	10	NA		1.01	NA	NA	NA		NA	NA	NA		NA	NA	NA	NA	NA	NA	NA	NA	NA	109.01	1.33	NA	0.0194	61.72	38.28
song, 2017	https://doi.org/10.1016/j.ejps.2016.09.024	tetrandrine	0.00296	6.48	622.76	7.5		9				12.6		14.02						PBS	90	fetal bovine serum	10	NA		1.01	NA	NA	NA		NA	NA	NA		NA	NA	NA	NA	NA	NA	NA	NA	NA	109.01	1.33	NA	0.0194	61.72	38.28
song, 2017	https://doi.org/10.1016/j.ejps.2016.09.024	tetrandrine	0.00296	6.48	622.76	6.3		9.8				14.7		16.9						normal saline	100			NA		1.01	NA	NA	NA		NA	NA	NA		NA	NA	NA	NA	NA	NA	NA	NA	NA	105.47	1.33	NA	0.0194	61.72	38.28
song, 2017	https://doi.org/10.1016/j.ejps.2016.09.024	tetrandrine	0.00296	6.48	622.76	5		13.1				18.5		21.8						normal saline	100			NA		0	NA	NA	NA		NA	NA	NA		NA	NA	NA	NA	NA	NA	NA	NA	NA	105.47	1.33	NA	0.0194	61.72	38.28
MA, 2017	https://doi.org/10.1080/21691401.2017.1394874	docetaxel	0.0127	2.4	807.88	28		39		54		65						27	405	PBS	100			7.4	Tween 80	0.106	37	100	25		NA	NA	NA		NA	NA	NA	NA	NA	NA	NA	NA	NA	103.7	7.9	NA	0.13	68.75	31.25
MA, 2017	https://doi.org/10.1080/21691401.2017.1394874	docetaxel	0.0127	2.4	807.88	25		32		42		60						33	960	PBS	100			7.4	Tween 80	1.06	37	100	25		NA	NA	NA		NA	NA	NA	NA	NA	NA	NA	NA	NA	116.5	9.3	NA	0.13	68.75	31.25
yalchin, 2017	http://dx.doi.org/10.1080/10837450.2017.1357733	gemcitabine HCL	0.824	0.28	299.66	29		70		82		88.95						39	126	PBS	100			7.4		1.06	37	100	NA		NA	NA	NA		NA	NA	NA	NA	NA	NA	NA	NA	NA	289	34.2	NA	NA	80	20
yalchin, 2017	http://dx.doi.org/10.1080/10837450.2017.1357733	gemcitabine HCL	0.824	0.28	299.66	27		66		79		86.73						39	138	PBS	100			7.4		1.06	37	100	NA		NA	NA	NA		NA	NA	NA	NA	NA	NA	NA	NA	NA	219	26.4	NA	NA	66.67	33.33
yalchin, 2017	http://dx.doi.org/10.1080/10837450.2017.1357733	gemcitabine HCL	0.824	0.28	299.66	24		64		78		84.26						48	150	PBS	100			7.4		1.06	37	100	NA		NA	NA	NA		NA	NA	NA	NA	NA	NA	NA	NA	NA	191	10.4	NA	NA	50	50
yalchin, 2017	http://dx.doi.org/10.1080/10837450.2017.1357733	gemcitabine HCL	0.824	0.28	299.66	28		69		86		91						39	132	PBS	100			7.4		0	37	100	NA		NA	NA	NA		NA	NA	NA	NA	NA	NA	NA	NA	NA	203	16.6	NA	NA	66.67	33.33
yalchin, 2017	http://dx.doi.org/10.1080/10837450.2017.1357733	gemcitabine HCL	0.824	0.28	299.66	30		75		91		97.51						39	120	PBS	100			7.4		0	37	100	NA		NA	NA	NA		NA	NA	NA	NA	NA	NA	NA	NA	NA	225	24.2	NA	NA	66.67	33.33
bhatt, 2017	https://doi.org/10.1016/j.ijpharm.2017.11.048	paclitaxel	0.00556	3	853.91	17.5		28		29.9		39.56						71		PBS	100			7.4	Tween 80	0	37	150	100		NA	NA	1		NA	NA	NA	NA	NA	NA	NA	NA	NA	150.3	3.2	NA	0.033	70	30
petal, 2016	https://doi.org/10.1016/j.ejps.2016.08.057	lopinavir	0.00192	4.69	628.8	93.92												NA	NA	PBS	100			6.8		0	37	50	900		100	NA	NA		NA	NA	NA	NA	NA	NA	NA	NA	NA	316.4	13.6	NA	0.2	70	30
petal, 2016	https://doi.org/10.1016/j.ejps.2016.08.057	lopinavir	0.00192	4.69	628.8	96.23												NA	NA	PBS	100			6.8		0	37	50	900		100	NA	NA		NA	NA	NA	NA	NA	NA	NA	NA	NA	575.4	24.74	NA	0.13	70	30
petal, 2016	https://doi.org/10.1016/j.ejps.2016.08.057	lopinavir	0.00192	4.69	628.8	83.34												NA	NA	PBS	100			6.8		0	37	50	900		100	NA	NA		NA	NA	NA	NA	NA	NA	NA	NA	NA	583.3	25.08	NA	0.1	70	30
eloy, 2016	https://doi.org/10.1016/j.colsurfb.2016.01.032	paclitaxel	0.00556	3	853.91					3		5		6		7				PBS	100			7.4	sodium lauryl sulfate	0	37	150	50		NA	NA	NA		NA	NA	NA	NA	NA	NA	NA	NA	NA	124.1	4.76	NA	0.0264	84	16
eloy, 2016	https://doi.org/10.1016/j.colsurfb.2016.01.032	sirolimus	0.00173	4.63	914.19							12.6		15		15				PBS	100			7.4	sodium lauryl sulfate	0	37	150	50		NA	NA	NA		NA	NA	NA	NA	NA	NA	NA	NA	NA	133.84	8.35	NA	0.08	84	16
eloy, 2016	https://doi.org/10.1016/j.colsurfb.2016.01.032	paclitaxel	0.00556	3	853.91			6		7		6		12.5		18				PBS	100			7.4	sodium lauryl sulfate	0	37	150	50		NA	NA	NA		NA	NA	NA	NA	NA	NA	NA	NA	NA	136.95	7.28	NA	0.0264	84	16
eloy, 2016	https://doi.org/10.1016/j.colsurfb.2016.01.032	sirolimus	0.00173	4.63	914.19			7.5		9.5		9		11		15				PBS	100			7.4	sodium lauryl sulfate	0	37	150	50		NA	NA	NA		NA	NA	NA	NA	NA	NA	NA	NA	NA	136.95	7.28	NA	0.08	84	16
wang, 2016	https://doi.org/10.1016/j.ijpharm.2016.09.043	risperidone	2.33	3.27	410.48	50		77										13	60	PBS	100			7.4		0	37	100	30		NA	NA	NA		NA	NA	NA	NA	NA	NA	NA	NA	NA	124.2	3	NA	NA	79.96	20.04
xu, 2016	https://doi.org/10.3109/21691401.2014.951722	paclitaxel	0.00556	3	853.91	4		13		22		42						370		PBS	100			7.4	tween 80	0.106	37	75	100		10	NA	NA		NA	NA	NA	NA	NA	NA	NA	NA	NA	82.2	7.6	NA	0.0469	82.16	17.84
li, 2016	https://doi.org/10.1038/srep38787	docetaxel	0.0127	2.4	807.88					24.5		50		88		103		343	1440	NaH2PO4/Na2HPO4 buffer solution	100			6.8	tween 80	0.106	37	75	30		NA	NA	NA		NA	NA	NA	NA	NA	NA	NA	NA	NA	159.5	1.5	NA	0.0077	60	40
li, 2016	https://doi.org/10.1038/srep38787	docetaxel	0.0127	2.4	807.88			13.5		25.5		55		78		98		343	1330	NaH2PO4/Na2HPO4 buffer solution	100			6.8	tween 80	0.106	37	75	30		NA	NA	NA		NA	NA	NA	NA	NA	NA	NA	NA	NA	145.8	1.6	NA	0.0031	60	40
li, 2016	https://doi.org/10.1038/srep38787	docetaxel	0.0127	2.4	807.88			13.5		26		56		83		102		343	1200	NaH2PO4/Na2HPO4 buffer solution	100			6.8	tween 80	0.106	37	75	30		NA	NA	NA		NA	NA	NA	NA	NA	NA	NA	NA	NA	145.3	1.6	NA	0.0015	60	40
li, 2016	https://doi.org/10.1038/srep38787	docetaxel	0.0127	2.4	807.88			6.4		20		51		73		90		516	1440	NaH2PO4/Na2HPO4 buffer solution	100			6.8	tween 80	0.106	37	75	30		NA	NA	NA		NA	NA	NA	NA	NA	NA	NA	NA	NA	147.2	1.6	NA	0.00077	60	40
zalba, 2015	https://doi.org/10.1016/j.jconrel.2015.05.271	oxaliplatin	6	-0.47	397.294	22		34.8		34		33						52		isotonic hepes saline	100			NA		0.106	37	NA	500		0.06	1	0.06		NA	NA	NA	NA	NA	NA	NA	NA	NA	119.6	0.36	NA	NA	66.67	33.33
zalba, 2015	https://doi.org/10.1016/j.jconrel.2015.05.271	oxaliplatin	6	-0.47	397.294	16		23.3		23		26						132		isotonic hepes saline	100			NA		0	37	NA	500		0.06	1	0.06		NA	NA	NA	NA	NA	NA	NA	NA	NA	123	1.59	NA	NA	66.67	33.33
zalba, 2015	https://doi.org/10.1016/j.jconrel.2015.05.271	oxaliplatin	6	-0.47	397.294	21.5		30		32		35						54		isotonic hepes saline	100			NA		0	37	NA	500		0.06	1	0.06		NA	NA	NA	NA	NA	NA	NA	NA	NA	120	1.19	NA	NA	66.67	33.33
shavi, 2015	10.3109/08982104.2015.1029493	anastrozole	0.53	1.58	293.37					87		96.23		96.23		96.23		0	272	PBS	100			7.4		0	37	NA	10		NA	NA	NA		NA	NA	NA	NA	NA	NA	NA	NA	NA	164.44	4.9	NA	0.1317	80.02	19.98
shavi, 2015	10.3109/08982104.2015.1029493	anastrozole	0.53	1.58	293.37					79		96.23		96.23		96.23		0	272	PBS	100			7.4		0	37	NA	10		NA	NA	NA		NA	NA	NA	NA	NA	NA	NA	NA	NA	173.8	8.9	NA	0.0941	85.73	14.27
shavi, 2015	10.3109/08982104.2015.1029493	anastrozole	0.53	1.58	293.37					44		78		95		95		0	573	PBS	100			7.4		0	37	NA	10		NA	NA	NA		NA	NA	NA	NA	NA	NA	NA	NA	NA	183	7.1	NA	0.0732	88.9	11.1
shavi, 2015	10.3109/08982104.2015.1029493	anastrozole	0.53	1.58	293.37					43		51.98		81		95		0	1200	PBS	100			7.4		0	37	NA	10		NA	NA	NA		NA	NA	NA	NA	NA	NA	NA	NA	NA	194.7	6.7	NA	0.0658	90.01	9.99
mohan, 2015	https://doi.org/10.1016/j.ejpb.2015.11.017	resveratrol	0.0688	2.57	228.243			16		28		48		65		75		357	1450	PBS	100			7.4		0	37	NA	25		NA	NA	NA		211.5	60	250	480	250	720	2015.4	1440	7.4	253.23	38.8	NA	0.025	95	5
mohan, 2015	https://doi.org/10.1016/j.ejpb.2015.11.017	resveratrol	0.0688	2.57	228.243			23		44		76						214	600	simulated saliva solution	100			6.8		0	37	NA	25		NA	NA	NA		NA	NA	NA	NA	NA	NA	NA	NA	NA	253.23	38.8	NA	0.025	95	5
mohan, 2015	https://doi.org/10.1016/j.ejpb.2015.11.017	doxorubicin HCl	1.18	1.41	579.98			18		27		53		69		78		285	1150	PBS	100			7.4		0	37	NA	25		NA	NA	NA		211.5	60	250	480	250	720	2015.4	1440	7.4	253.23	38.8	NA	0.0125	95	5
mohan, 2015	https://doi.org/10.1016/j.ejpb.2015.11.017	doxorubicin HCl	1.18	1.41	579.98			18		22.3		45.6		69		85		380	1563	simulated saliva solution	100			6.8		0	37	NA	25		NA	NA	NA		NA	NA	NA	NA	NA	NA	NA	NA	NA	253.23	38.8	NA	0.0125	95	5
chen, 2015	10.3892/ol.2015.324	paclitaxel	0.00556	3	853.91					15		38		57		64		648	2470	PBS	100			7.4	tween 80	0	37	NA	50		NA	NA	NA		NA	NA	NA	NA	NA	NA	NA	NA	NA	123.6	11.8	NA	NA	60	40
chen, 2015	10.3892/ol.2015.324	paclitaxel	0.00556	3	853.91					15		40		60		68		612	2160	PBS	100			7.4	tween 80	0	37	NA	50		NA	NA	NA		NA	NA	NA	NA	NA	NA	NA	NA	NA	117.4	12.1	NA	NA	60	40
wang, 2015	10.3892/or.2014.3644	paclitaxel	0.00556	3	853.91	0				31		42						337		PBS	100			7.4	tween 80	0.106	37	50	100		NA	NA	NA		NA	NA	NA	NA	NA	NA	NA	NA	NA	101	10.8	NA	NA	60	40
wang, 2015	10.3892/or.2014.3644	paclitaxel	0.00556	3	853.91	0		13		31		38						337		PBS	100			7.4	tween 80	0.106	37	50	100		NA	NA	NA		NA	NA	NA	NA	NA	NA	NA	NA	NA	109	9.4	NA	NA	60	40
wang, 2015	10.3892/or.2014.3644	paclitaxel	0.00556	3	853.91	0				33		44						320		PBS	100			7.4	tween 80	0.106	37	50	100		NA	NA	NA		NA	NA	NA	NA	NA	NA	NA	NA	NA	110	6.7	NA	NA	60	40
wang, 2015	10.3892/or.2014.3644	paclitaxel	0.00556	3	853.91	0		14.2		30		37						300		PBS	100			7.4	tween 80	0.106	37	50	100		NA	NA	NA		NA	NA	NA	NA	NA	NA	NA	NA	NA	106	7.5	NA	NA	60	40
upadhyay, 2015	https://doi.org/10.1016/j.jsps.2016.07.003	quetiapine fumarate	0.0403	2.93	883.09	6.75		40.4										162	261	SNF	100			6.8		0	37	NA	100		NA	NA	NA		NA	NA	NA	NA	NA	NA	NA	NA	NA	NA	NA	NA	NA	50	50
upadhyay, 2015	https://doi.org/10.1016/j.jsps.2016.07.003	quetiapine fumarate	0.0403	2.93	883.09	12.82		52.26										106	232	SNF	100			6.8		0	37	NA	100		NA	NA	NA		NA	NA	NA	NA	NA	NA	NA	NA	NA	NA	NA	NA	NA	66.67	33.33
upadhyay, 2015	https://doi.org/10.1016/j.jsps.2016.07.003	quetiapine fumarate	0.0403	2.93	883.09	11.05		47.42										118	243	SNF	100			6.8		0	37	NA	100		NA	NA	NA		NA	NA	NA	NA	NA	NA	NA	NA	NA	NA	NA	NA	NA	75	25
satyavathi, 2015	http://dx.doi.org/10.4172/2325-9604.1000133	cabazitaxel	0.00413	3.69	835.93	8		33.5		63		90						153	312	PBS	100			7.4		0	37	NA	100		NA	NA	NA		NA	NA	NA	NA	NA	NA	NA	NA	NA	356	NA	NA	0.0515	66.62	33.38
satyavathi, 2015	http://dx.doi.org/10.4172/2325-9604.1000133	cabazitaxel	0.00413	3.69	835.93	10.5		39		71		90						120	288	PBS	100			7.4		0	37	NA	100		NA	NA	NA		NA	NA	NA	NA	NA	NA	NA	NA	NA	317	NA	NA	0.0475	53.79	46.21
satyavathi, 2015	http://dx.doi.org/10.4172/2325-9604.1000133	cabazitaxel	0.00413	3.69	835.93	13		40.5		72		94						90	279	PBS	100			7.4		0	37	NA	100		NA	NA	NA		NA	NA	NA	NA	NA	NA	NA	NA	NA	564	NA	NA	0.0441	42.8	57.2
bowey, 2013	http://dx.doi.org/10.1016/j.ejpb.2013.10.006	17β stradiol	0.0036	4.01	272.38	6		38		56		65		72				108	354	PBS	60	ethanol	40	7.4		0	37	NA	NA		NA	NA	NA		NA	NA	NA	NA	NA	NA	NA	NA	NA	217	6.43	NA	5	100	0
bowey, 2013	http://dx.doi.org/10.1016/j.ejpb.2013.10.006	17β stradiol	0.0036	4.01	272.38	10		38		60		72		78				114	324	PBS	60	ethanol	40	7.4		0	37	NA	NA		NA	NA	NA		NA	NA	NA	NA	NA	NA	NA	NA	NA	199	6.22	NA	5	100	0
bowey, 2013	http://dx.doi.org/10.1016/j.ejpb.2013.10.006	17β stradiol	0.0036	4.01	272.38	10		44		64		78		82				90	282	PBS	60	ethanol	40	7.4		0	37	NA	NA		NA	NA	NA		NA	NA	NA	NA	NA	NA	NA	NA	NA	207	2.05	NA	5	100	0
cosco, 2012	10.1016/j.ijpharm.2011.10.056	tamoxifen	0.00102	5.93	371.51	9		27		33		59						180	876	PBS	70	ethanol	30	7.4	tween 80	0	37		200	94.2	0.4239	1	0.42		NA	NA	NA	NA	NA	NA	NA	NA	NA	161.7	1.095	NA	0.050189	70	30
cosco, 2012	10.1016/j.ijpharm.2011.10.056	tamoxifen	0.00102	5.93	371.51	8		31		39		63						138	750	PBS	70	ethanol	30	7.4	tween 80	0	37		200	89.7	0.40365	1	0.4		NA	NA	NA	NA	NA	NA	NA	NA	NA	155.8	0.782	NA	0.050189	70	30
begum, 2012	http://dx.doi.org/10.13040/IJPSR.0975-8232.3(1).154-61	celecoxib	0.00503	3.53	381.37	3.5				24		68.19						420	1000	PBS	100			7.4		0	37	100	90		NA	10	NA		NA	NA	NA	NA	NA	NA	NA	NA	NA	5200	100	NA	0.2032	100	0
begum, 2012	http://dx.doi.org/10.13040/IJPSR.0975-8232.3(1).154-61	celecoxib	0.00503	3.53	381.37					24		65.06						420	980	PBS	100			7.4		0	37	100	90		NA	10	NA		NA	NA	NA	NA	NA	NA	NA	NA	NA	4500	300	NA	0.3048	100	0
begum, 2012	http://dx.doi.org/10.13040/IJPSR.0975-8232.3(1).154-61	celecoxib	0.00503	3.53	381.37	3		12		25		62.68						380	1010	PBS	100			7.4		0	37	100	90		NA	10	NA		NA	NA	NA	NA	NA	NA	NA	NA	NA	5500	700	NA	0.1638	80.61	19.39
begum, 2012	http://dx.doi.org/10.13040/IJPSR.0975-8232.3(1).154-61	celecoxib	0.00503	3.53	381.37	1		9		22		53.89						440	1210	PBS	100			7.4		0	37	100	90		NA	10	NA		NA	NA	NA	NA	NA	NA	NA	NA	NA	4800	400	NA	0.1372	67.52	32.48
begum, 2012	http://dx.doi.org/10.13040/IJPSR.0975-8232.3(1).154-61	celecoxib	0.00503	3.53	381.37	1		5		14		51.27						630	1350	PBS	100			7.4		0	37	100	90		NA	10	NA		NA	NA	NA	NA	NA	NA	NA	NA	NA	4700	300	NA	0.1015	49.94	50.06
natarajan, 2012	https://doi.org/10.2147/IJN.S25468	latanoprost	0.0129	3.98	432.59			1.7		3.7		10.5		21		29.9		2736	8928	PBS	100			7.4		0	37	50	40		NA	NA	NA		NA	NA	NA	NA	NA	NA	NA	NA	NA	109	18	NA	0.154	100	0
KUMAR, 2011	https://doi.org/10.3109/10717544.2011.595840	plumbagin	1.23	2.15	188.18	26		47		79		100						28	276	PBS				7.4	tween 80	0	37		50		NA	NA	NA		NA	NA	NA	NA	NA	NA	NA	NA	NA	123.95	4.03	NA	0.05	90	10
KUMAR, 2011	https://doi.org/10.3109/10717544.2011.595840	plumbagin	1.23	2.15	188.18	23		45		58		83.2						42	312	PBS				7.4	tween 80	0	37		50		NA	NA	NA		NA	NA	NA	NA	NA	NA	NA	NA	NA	123.4	1.27	NA	0.05	81.82	18.18
KUMAR, 2011	https://doi.org/10.3109/10717544.2011.595840	plumbagin	1.23	2.15	188.18	16		27		57		69.55						108	432	PBS				7.4	tween 80	0	37		50		NA	NA	NA		NA	NA	NA	NA	NA	NA	NA	NA	NA	123.45	2.19	NA	0.05	75	25
KUMAR, 2011	https://doi.org/10.3109/10717544.2011.595840	plumbagin	1.23	2.15	188.18	15		24		33		41.16						144		PBS				7.4	tween 80	0	37		50		NA	NA	NA		NA	NA	NA	NA	NA	NA	NA	NA	NA	141.95	10.11	NA	0.05	64.29	35.71
lu, 2011	10.3109/10717544.2011.589085	eThinylestradiol	0.0113	3.67	269.4	5.5		40.5		48.5		68		76				150	516	PBS	100			7.4		0	37		30		0.3	5	0.06		NA	NA	NA	NA	NA	NA	NA	NA	NA	221.5	2.8	NA	0.4286	100	0
lu, 2011	10.3109/10717544.2011.589085	eThinylestradiol	0.0113	3.67	269.4	5		39		45.5		62		70				156	720	PBS	100			7.4		0	37		30		0.3	5	0.06		NA	NA	NA	NA	NA	NA	NA	NA	NA	191.5	1.7	NA	0.25	87.5	12.5
lu, 2011	10.3109/10717544.2011.589085	eThinylestradiol	0.0113	3.67	269.4	4.5		37		47.5		63		73.5				162	588	PBS	100			7.4		0	37		30		0.3	5	0.06		NA	NA	NA	NA	NA	NA	NA	NA	NA	212.7	2.4	NA	0.1111	77.78	22.22
natarjan, 2011	https://doi.org/10.1371/journal.pone.0024513	latanoprost	0.0129	3.98	432.59							8		16		22.5		3629	12393	PBS	100			7.4		0	37	50	40		NA	1	NA	PBS (150mM)	93	541	NA	NA	NA	NA	NA	NA	7.4	86	NA	NA	0.044	100	0
natarjan, 2011	https://doi.org/10.1371/journal.pone.0024513	latanoprost	0.0129	3.98	432.59							15		27		36		1958	6771	PBS	100			7.4		2.1	37	50	40		NA	1	NA	PBS (150mM)	145	541	NA	NA	NA	NA	NA	NA	7.4	78	NA	NA	0.114	100	0
natarjan, 2011	https://doi.org/10.1371/journal.pone.0024513	latanoprost	0.0129	3.98	432.59							15		27		37.5		1958	6188	PBS	100			7.4		0	37	50	40		NA	1	NA	PBS (150mM)	442	541	NA	NA	NA	NA	NA	NA	7.4	194	NA	NA	0.143	100	0
natarjan, 2011	https://doi.org/10.1371/journal.pone.0024513	latanoprost	0.0129	3.98	432.59							15		27		39		1958	5721	PBS	100			7.4		0	37	50	40		NA	1	NA	PBS (150mM)	2020	541	NA	NA	NA	NA	NA	NA	7.4	118	NA	NA	0.17	100	0
abdelbary, 2011	10.3109/10837450903479988	ciprofloxacine HCL	1.35	-0.57	385.82	32		68		78.15								27	123	SLF	100			7.4		0	37	50	50		NA	NA	NA		NA	NA	NA	NA	NA	NA	NA	NA	NA	NA	NA	NA	100	0	0
abdelbary, 2011	10.3109/10837450903479988	ciprofloxacine HCL	1.35	-0.57	385.82	26		40		54.07								30	351	SLF	100			7.4		0	37	50	50		NA	NA	NA		NA	NA	NA	NA	NA	NA	NA	NA	NA	NA	NA	NA	100	0	0
abdelbary, 2011	10.3109/10837450903479988	ciprofloxacine HCL	1.35	-0.57	385.82	32		58		71.79								18	180	SLF	100			7.4		0	37	50	50		NA	NA	NA		NA	NA	NA	NA	NA	NA	NA	NA	NA	NA	NA	NA	100	0	0
abdelbary, 2011	10.3109/10837450903479988	ciprofloxacine HCL	1.35	-0.57	385.82	36		56		62.14								21	153	SLF	100			7.4		0	37	50	50		NA	NA	NA		NA	NA	NA	NA	NA	NA	NA	NA	NA	NA	NA	NA	100	0	0
abdelbary, 2011	10.3109/10837450903479988	ciprofloxacine HCL	1.35	-0.57	385.82	24		43		47.88								21		SLF	100			7.4		0	37	50	50		NA	NA	NA		NA	NA	NA	NA	NA	NA	NA	NA	NA	NA	NA	NA	76.92	23.08	0.3
EL-NESR, 2010	https://doi.org/10.1016/j.jsps.2010.07.003	fluconazole	1.39	0.5	306.27	18		36		52								66	416	PBS	100			7.4		0	37	150	35		20	1	20		NA	NA	NA	NA	NA	NA	NA	NA	NA	NA	NA	NA	0.302	58.8	35.3
EL-NESR, 2010	https://doi.org/10.1016/j.jsps.2010.07.003	fluconazole	1.39	0.5	306.27	17		32		45								84	556	PBS	100			7.4		0	37	150	35		20	1	20		NA	NA	NA	NA	NA	NA	NA	NA	NA	NA	NA	NA	0.292	55.5	33.3
EL-NESR, 2010	https://doi.org/10.1016/j.jsps.2010.07.003	fluconazole	1.39	0.5	306.27	23		42		55								51	375	PBS	100			7.4		0	37	150	35		20	1	20		NA	NA	NA	NA	NA	NA	NA	NA	NA	NA	NA	NA	0.3	55.5	33.3
EL-NESR, 2010	https://doi.org/10.1016/j.jsps.2010.07.003	fluconazole	1.39	0.5	306.27	14		33		46								123	556	PBS	100			7.4		0	37	150	35		20	1	20		NA	NA	NA	NA	NA	NA	NA	NA	NA	NA	NA	NA	0.29	52.6	42.1
EL-NESR, 2010	https://doi.org/10.1016/j.jsps.2010.07.003	fluconazole	1.39	0.5	306.27	13		27		41								138		PBS	100			7.4		0	37	150	35		20	1	20		NA	NA	NA	NA	NA	NA	NA	NA	NA	NA	NA	NA	0.285	50	40
EL-NESR, 2010	https://doi.org/10.1016/j.jsps.2010.07.003	fluconazole	1.39	0.5	306.27	16		35		50								108	438	PBS	100			7.4		0	37	150	35		20	1	20		NA	NA	NA	NA	NA	NA	NA	NA	NA	NA	NA	NA	0.289	50	40
zhang, 2010	https://doi.org/10.1016/j.ejpb.2010.01.002	Combretastatin A4	0.00977	3.32	316.35	16		40.5		57.5		75		78				78	348	physiological saline	100			NA		0	37	NA	250	73.3	0.733	1	0.733		NA	NA	NA	NA	NA	NA	NA	NA	NA	91.2	1.84	NA	0.1663	70	30
zhang, 2010	https://doi.org/10.1016/j.ejpb.2010.01.002	Combretastatin A4	0.00977	3.32	316.35	23		60.5		78.9		83		88				48	156	physiological saline	100			NA		0	37	NA	250	73.9	0.739	1	0.739		NA	NA	NA	NA	NA	NA	NA	NA	NA	90.54	0.34	NA	NA	70	30
zhai, 2010	10.1166/jnn.2010.2393	docetaxel	0.0127	2.4	807.88	1.2		3		5.7		13		18		25.3		3120		PBS	100			7.4			37	NA	500		NA	NA	NA		NA	NA	NA	NA	NA	NA	NA	NA	NA	90.7	2.4	NA	0.051624	90	10
zhai, 2010	10.1166/jnn.2010.2393	docetaxel	0.0127	2.4	807.88	1.2		3		5		9		14.5		20		4320		PBS	100			7.4			37	NA	500		NA	NA	NA		NA	NA	NA	NA	NA	NA	NA	NA	NA	75.6	3.2	NA	0.051624	90	10
bhardwaj, 2010	https://doi.org/10.1016/j.ijpharm.2010.01.003	dexamethasone	0.089	1.83	392.46	39		83		90		91		92					105	HEPES buffer	100			7.4			37	50	50		NA	NA	NA	HEPES buffer (10 mM)	NA	NA	NA	NA	NA	NA	NA	NA	NA	43.45	1.29	NA	0.2	100	0
bhardwaj, 2010	https://doi.org/10.1016/j.ijpharm.2010.01.003	dexamethasone	0.089	1.83	392.46	36		83		95		96							105	HEPES buffer	100			7.4			37	50	50		NA	NA	NA	HEPES buffer (10 mM)	NA	NA	NA	NA	NA	NA	NA	NA	NA	433	174.5	NA	0.2	100	0
bhardwaj, 2010	https://doi.org/10.1016/j.ijpharm.2010.01.003	dexamethasone	0.089	1.83	392.46	32		65		76		84		90		92			144	HEPES buffer	100			7.4			37	50	50		NA	NA	NA	HEPES buffer (10 mM)	NA	NA	NA	NA	NA	NA	NA	NA	NA	728.3	125.32	NA	0.2	100	0
chen, 2009	10.1016/j.ijpharm.2009.04.022	fenofibrate	0.000707	5.2	360.83	9.5		33.2		59								132	405	distilled water	100			7.4	cremophor EL	2.1	37	100	100	84.91	2.55	3	0.85		NA	NA	NA	NA	NA	NA	NA	NA	NA	175	NA	NA	0.0477	66.62	33.38
hathout, 2007	https://doi.org/10.1208/pt0801001	acetazolamide	0.98	-0.26	222.25	34		51.5		54								33	224	PBS	100			7.4			37	50	75		2	1	2		NA	NA	NA	NA	NA	NA	NA	NA	NA	6970	NA	NA	NA	77.78	22.22
hathout, 2007	https://doi.org/10.1208/pt0801001	acetazolamide	0.98	-0.26	222.25	24		37		44.12								43		PBS	100			7.4			37	50	75		2	1	2		NA	NA	NA	NA	NA	NA	NA	NA	NA	NA	NA	NA	NA	63.64	36.36
hathout, 2007	https://doi.org/10.1208/pt0801001	acetazolamide	0.98	-0.26	222.25	24		35.5		40.69								43		PBS	100			7.4			37	50	75		2	1	2		NA	NA	NA	NA	NA	NA	NA	NA	NA	NA	NA	NA	NA	53.85	46.15
hathout, 2007	https://doi.org/10.1208/pt0801001	acetazolamide	0.98	-0.26	222.25	22.6		31		36.14								55		PBS	100			7.4			37	50	75		2	1	2		NA	NA	NA	NA	NA	NA	NA	NA	NA	NA	NA	NA	NA	50	50
hathout, 2007	https://doi.org/10.1208/pt0801001	acetazolamide	0.98	-0.26	222.25	22.5		32.5		36.5								53		PBS	100			7.4			37	50	75		2	1	2		NA	NA	NA	NA	NA	NA	NA	NA	NA	9340	NA	NA	NA	58.33	33.33
hathout, 2007	https://doi.org/10.1208/pt0801001	acetazolamide	0.98	-0.26	222.25	42.5		48.5		55								30	272	PBS	100			7.4			37	50	75		2	1	2		NA	NA	NA	NA	NA	NA	NA	NA	NA	7940	NA	NA	NA	58.33	33.33
dovod, 2005	10.1016/j.ijpharm.2004.07.045	5 flourouracil	11.1	-0.89	130.08	4		12		17.5										PBS	100			7.4			37	100	25		NA	NA	NA		NA	NA	NA	NA	NA	NA	NA	NA	NA	5400	NA	NA	1.7	81.62	18.38
dovod, 2005	10.1016/j.ijpharm.2004.07.045	5 flourouracil	11.1	-0.89	130.08	4.9		14.5		16								575		PBS	100			7.4			37	100	25		NA	NA	NA		NA	NA	NA	NA	NA	NA	NA	NA	NA	5000	NA	NA	1.74	85.55	14.45
dovod, 2005	10.1016/j.ijpharm.2004.07.045	5 flourouracil	11.1	-0.89	130.08	8.5		15.5		24.9								356.8		PBS	100			7.4			37	100	25		NA	NA	NA		NA	NA	NA	NA	NA	NA	NA	NA	NA	5000	NA	NA	1.76	88.09	11.91
BHALERAO, 2003	10.1081/DDC-120018380	salicylic acid	2.24	2.26	138.12	25.58		61.36										43	180	PBS	100			7.4			37	NA	400		NA	NA	NA		NA	NA	NA	NA	NA	NA	NA	NA	NA	333.3	NA	NA	NA	96.59	3.41
BHALERAO, 2003	10.1081/DDC-120018380	salicylic acid	2.24	2.26	138.12	28.6		67.49										38	161	PBS	100			7.4			37	NA	400		NA	NA	NA		NA	NA	NA	NA	NA	NA	NA	NA	NA	250	NA	NA	NA	93.01	6.99
BHALERAO, 2003	10.1081/DDC-120018380	salicylic acid	2.24	2.26	138.12	28.41		64.96										43	172	PBS	100			7.4			37	NA	400		NA	NA	NA		NA	NA	NA	NA	NA	NA	NA	NA	NA	200	NA	NA	NA	93.38	6.62
BHALERAO, 2003	10.1081/DDC-120018380	salicylic acid	2.24	2.26	138.12	22.88		58.57										50	202	PBS	100			7.4			37	NA	400		NA	NA	NA		NA	NA	NA	NA	NA	NA	NA	NA	NA	500	NA	NA	NA	96.59	3.41
BHALERAO, 2003	10.1081/DDC-120018380	salicylic acid	2.24	2.26	138.12	32.54		70.83										36	148	PBS	100			7.4			37	NA	400		NA	NA	NA		NA	NA	NA	NA	NA	NA	NA	NA	NA	271.3	NA	NA	NA	86.95	13.05
BHALERAO, 2003	10.1081/DDC-120018380	salicylic acid	2.24	2.26	138.12	26.26		62.45												PBS	100			7.4			37	NA	400		NA	NA	NA		NA	NA	NA	NA	NA	NA	NA	NA	NA	333.3	NA	NA	NA	93.38	6.62
[truncated: 29 more columns]
